# Supplementary material for: Synthesis, crystal and band structures, and optical properties of a novel quaternary mercury and cadmium chalcogenidehalide: (Hg2Cd2S2Br)Br
Source: Royal Society of Chemistry journal article supplement (doi:10.1039/c1ce05047h), 2011-01-01
Supplement: c1ce05047h.pdf [file c1ce05047h.pdf]

## Synthesis, crystal and band structures, and optical properties of a novel quaternary mercury and cadmium chalcogenide: (Hg<sub>2</sub>Cd<sub>2</sub>S<sub>2</sub>Br)Br

Jian-Ping Zou <sup>\*</sup>, Qiang Peng, Sheng-Lian Luo, Xin-Hua Tang, Ai-Qin Zhang, Gui-Sheng Zeng, Guo-Cong Guo <sup>\*</sup>

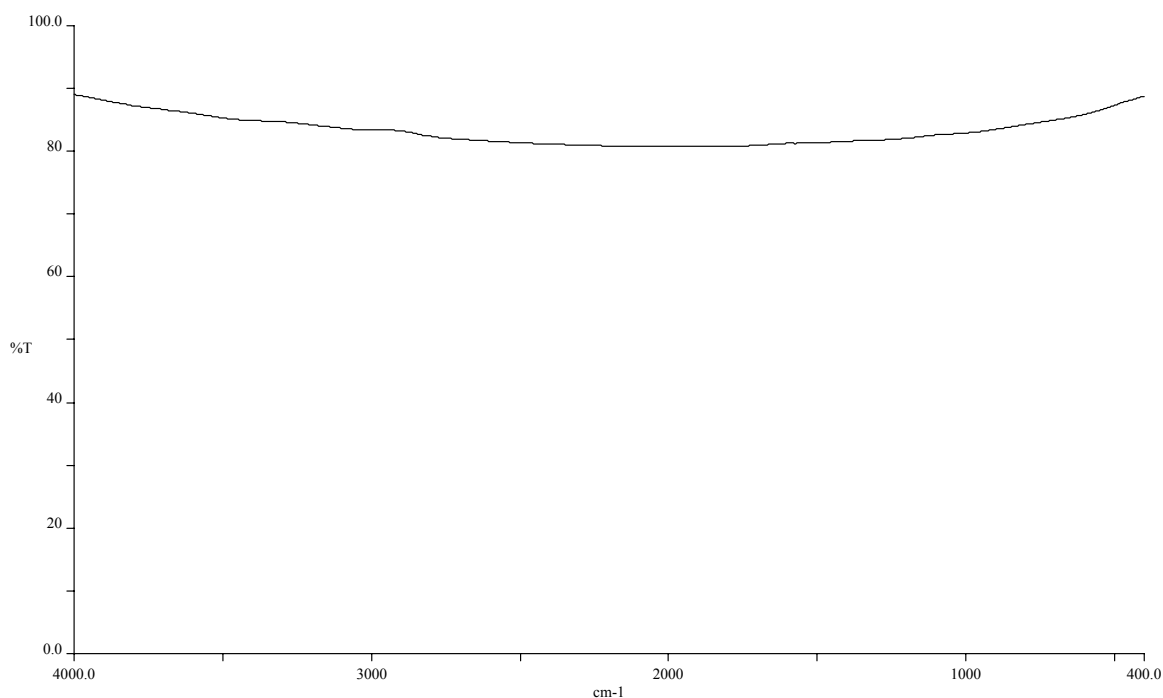

**Fig. S1.** FTIR spectrum of **1** on transparent pellets (1% samples mixed with KBr).

---

<sup>\*</sup> To whom correspondence should be addressed. Tel: +86 791 3953377; Fax: +86 791 3953373; E-mail: [zjp\\_112@126.com](mailto:zjp_112@126.com) (J.-P. Zou) or [gcguo@fjirsm.ac.cn](mailto:gcguo@fjirsm.ac.cn) (G.-C. Guo)

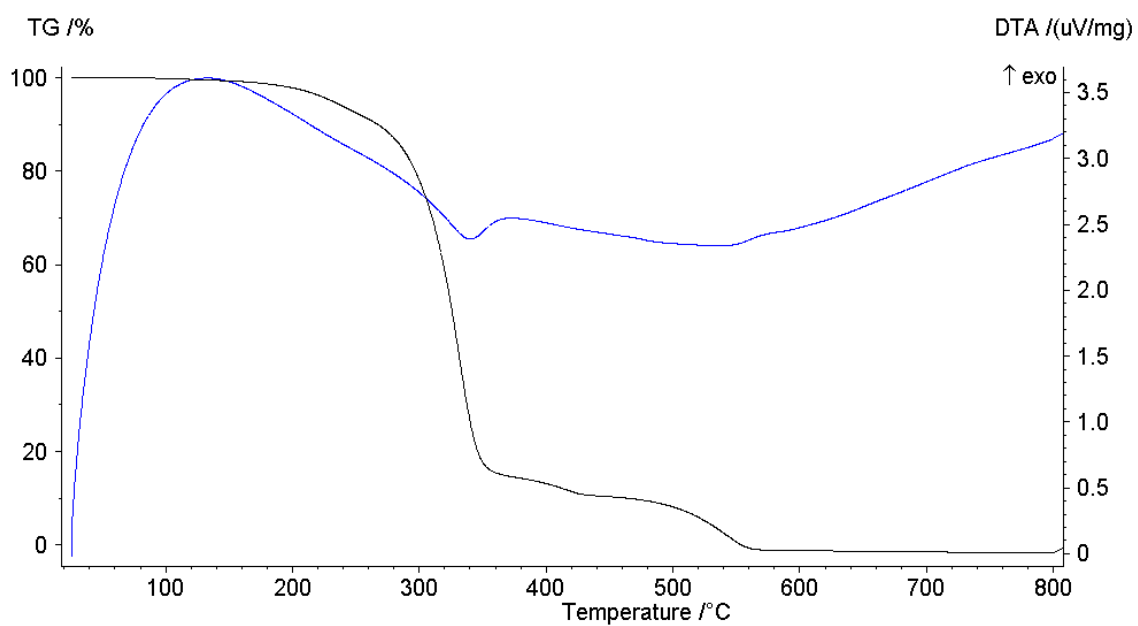

Fig. S2. TG-DTA curves of **1**.

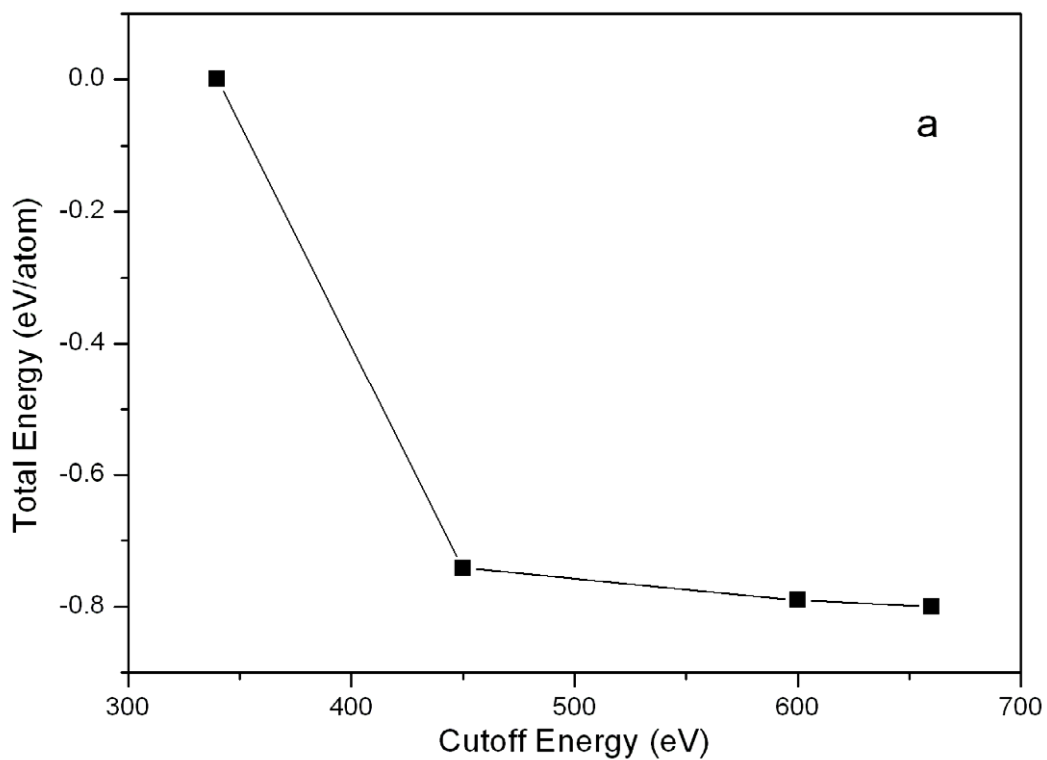

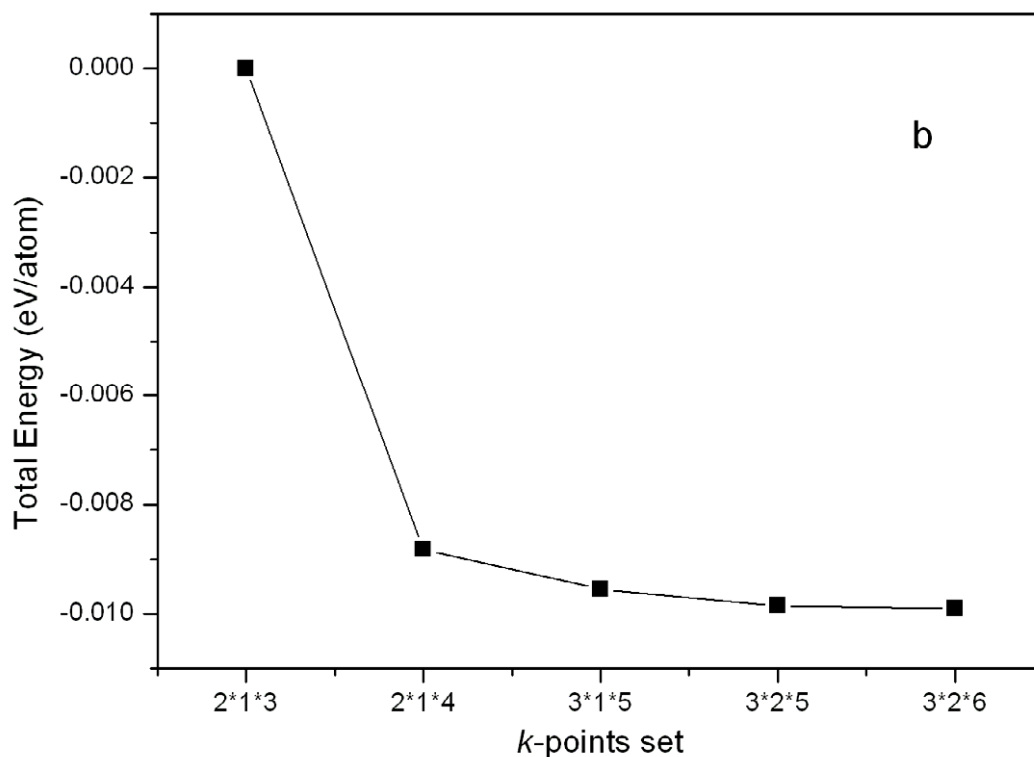

**Fig. S3.** Convergence of the total energy of **1** at different computational parameters. (a) Total energy versus the cutoff energy for the  $k$ -point mesh of  $3 \times 1 \times 5$ . (b) Total energy versus the  $k$ -point mesh for the cutoff energy of 450 eV.

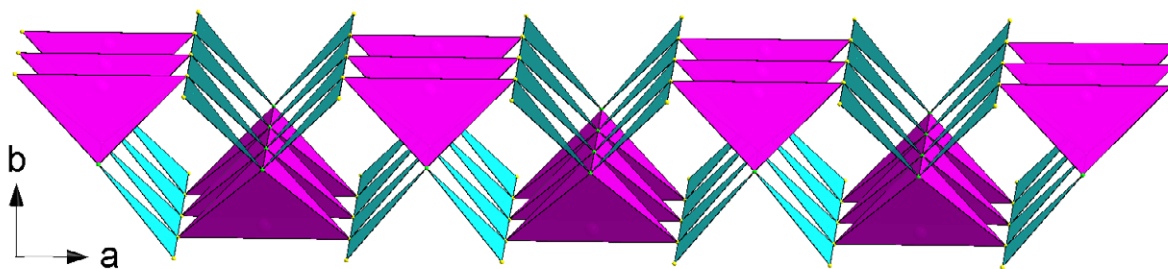

**Fig. S4.** A view of linear Hg tetrahedral chains and V-shape Cd trigonal chains extending along the  $c$  direction.

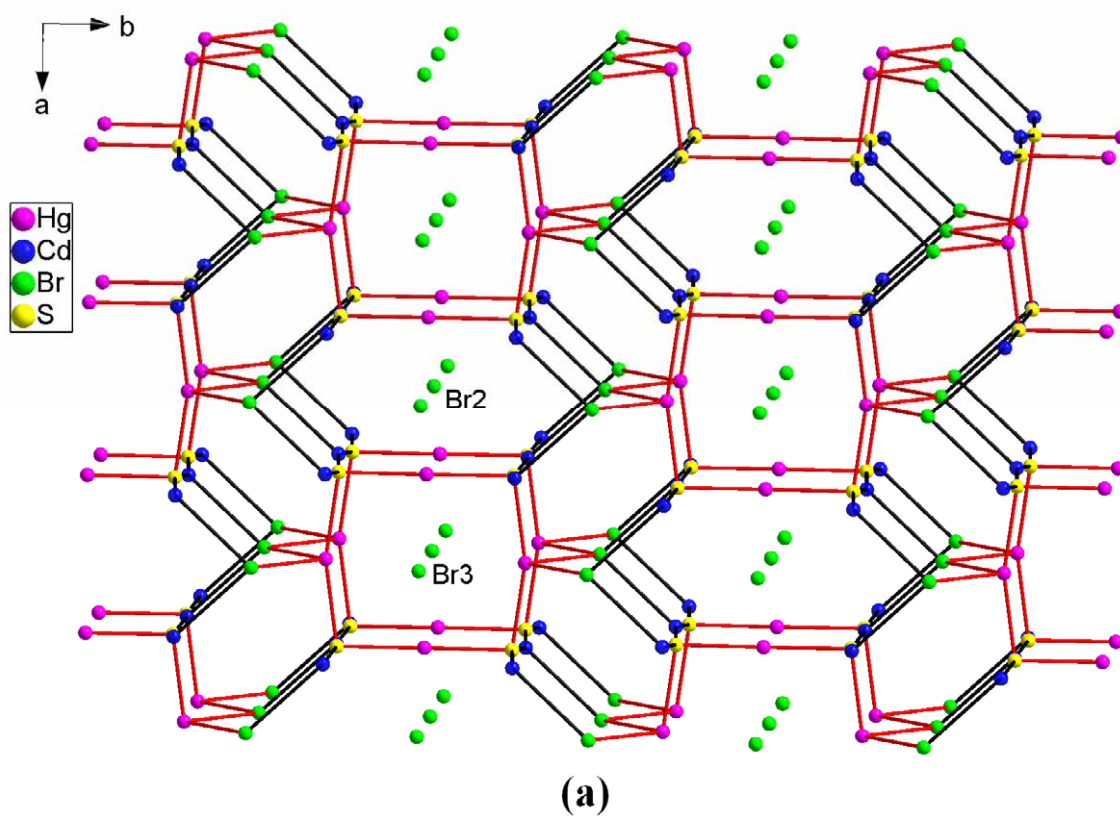

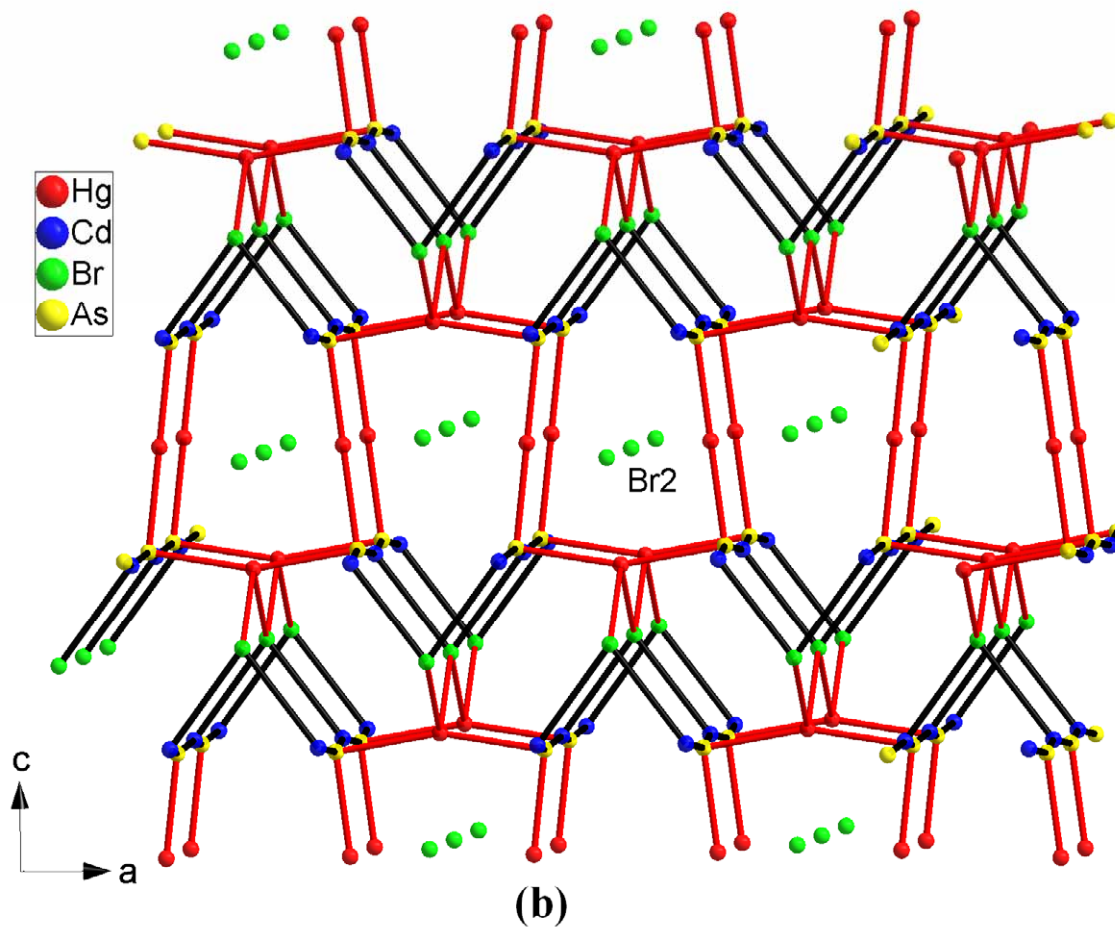

**Fig. S5.** (a) Crystal structure of **1**; (b) Crystal structure of the reported compound HgCdAsBr.

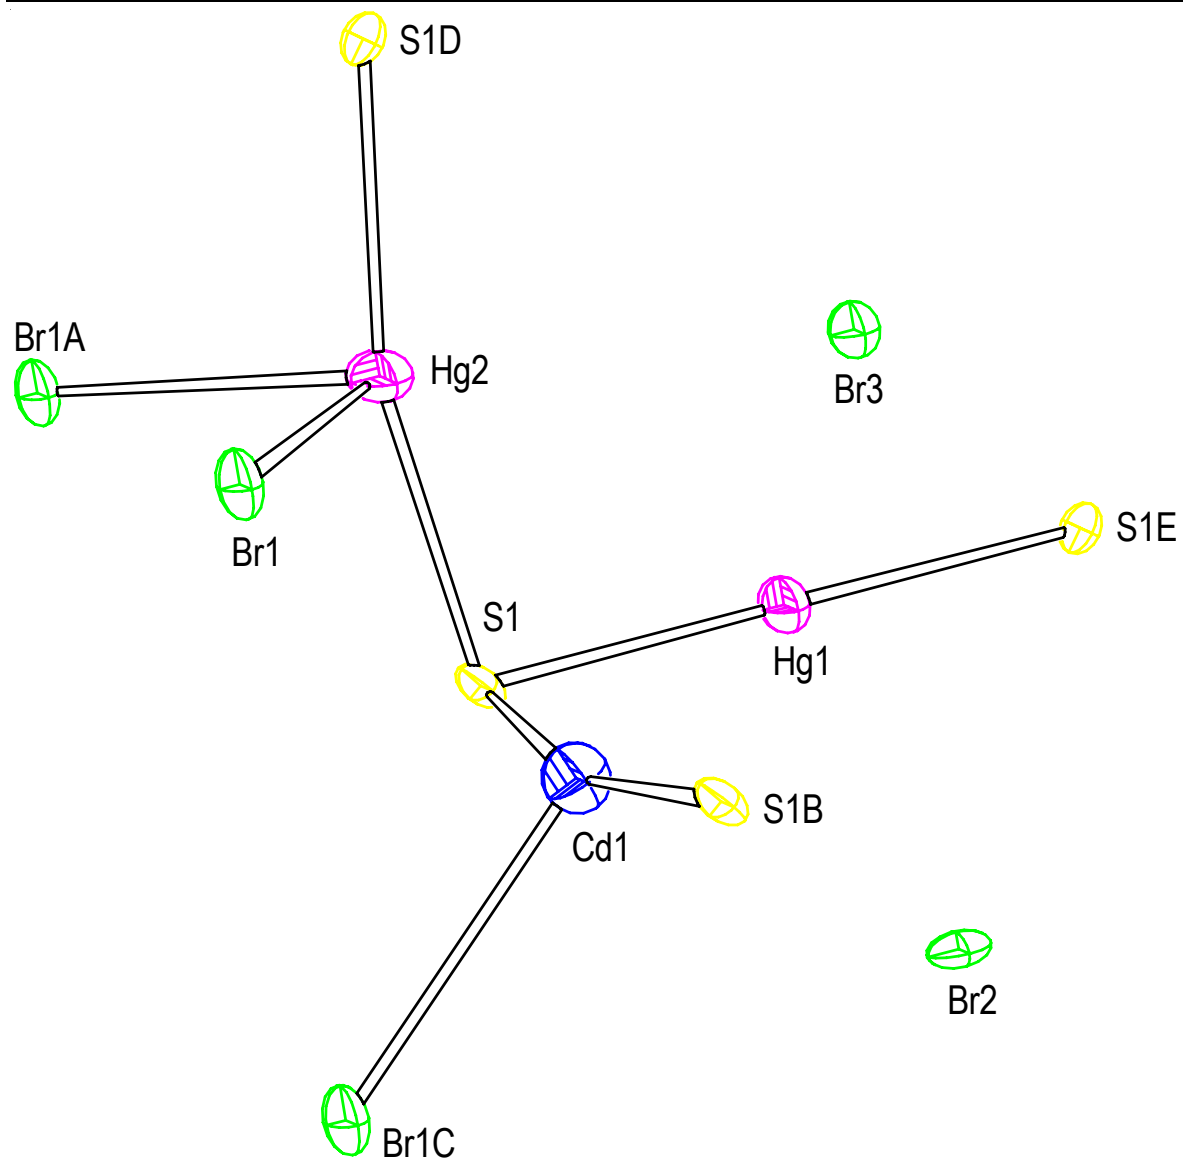

**Fig. S6.** Molecular structure of **1**. (Symmetric codes: A:  $x, y, 1 + z$ ; B:  $x, y, -1 + z$ ; C:  $0.5 - x, 0.5 - y, z$ ; D:  $1 - x, y, 1 - z$ ; E:  $x, 1 - y, 1 - z$ )

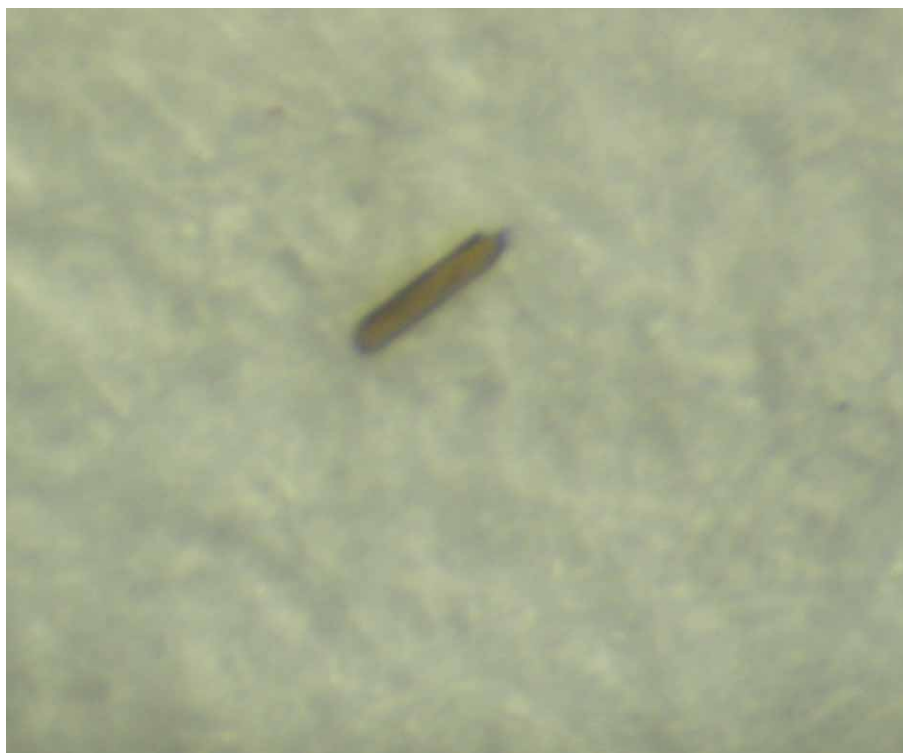

**Fig. S7.** The picture of a single crystal of **1**.
